# Supplementary material for: A sensitive and highly selective fluorescent sensor for In3+
Source: Royal Society of Chemistry journal article supplement (doi:10.1039/c0ob00002g), 2010-01-01
Supplement: c0ob00002g.pdf [file c0ob00002g.pdf]

## Electronic Supplementary Information

# A sensitive and highly selective fluorescent sensor for In<sup>3+</sup>

Yan-Chao Wu, Hui-Jing Li and Hua-Zheng Yang

*State Key Laboratory of Element-Organic Chemistry, Institute of Element-Organic Chemistry, Nankai University, Tianjin 300071, China, and Beijing National Laboratory for Molecular Sciences (BNLMS), CAS Key Laboratory of Molecular Recognition and Function, Institute of Chemistry, Chinese Academy of Sciences, Beijing 100190, China.*

*ycwu@iccas.ac.cn*

### 1. Table of Contents

|                                                            |            |
|------------------------------------------------------------|------------|
| <b>1. Table of Contents</b>                                | <b>S1</b>  |
| <b>2. General Information</b>                              | <b>S2</b>  |
| <b>3. Experimental Procedures</b>                          | <b>S3</b>  |
| <b>4. <sup>1</sup>H NMR and <sup>13</sup>C NMR Spectra</b> | <b>S6</b>  |
| <b>5. Fluorescence Spectra</b>                             | <b>S10</b> |

## 2. General Information

All reactions were performed in oven-dried flasks under a positive pressure of argon unless otherwise stated. Common reagents and materials were purchased from commercial sources and used as received. Solvents were dried by distillation under argon from the following: tetrahydrofuran (sodium/benzophenone); acetonitrile (calcium hydride). Organic extracts were, in general, dried over anhydrous sodium sulfate ( $\text{Na}_2\text{SO}_4$ ). TLC plates were visualized by exposure to ultraviolet light (UV) and/or submersion in ethanolic phosphomolybdic acid (PMA), aqueous ceric ammonium molybdate solution (CAM), or solutions of ninhydrin in *n*-butanol, followed by brief heating on a hot plate ( $\sim 200^\circ\text{C}$ , 10–15 s). NMR spectra were recorded on a 300 MHz spectrometer. Chemical shifts for protons are reported in parts per million ( $\delta$  scale) downfield from tetramethylsilane and are referenced to residual proton in the NMR solvents ( $\text{CHCl}_3$ :  $\delta$  7.26). Chemical shifts for carbon resonances are reported in parts per million ( $\delta$  scale) downfield from tetramethylsilane and are referenced to the carbon resonances of the solvent ( $\text{CDCl}_3$ :  $\delta$  77.0). Data are represented as follows: chemical shift, multiplicity (s = singlet, d = doublet, t = triplet, q = quartet, m = multiplet, br = broad), integration, and coupling constant ( $J$ ) in Hz. Infrared (IR) spectra were recorded on a Perkin Elmer 500 FT-IR spectrophotometer and are reported in terms of frequency of absorption ( $\text{cm}^{-1}$ ). UV-Vis spectra were recorded on a Shimadzu 2401 spectrophotometer. The fluorescence spectra were measured with a Hitachi F-4500 fluorescence spectrophotometer.

### 3. Experimental Procedures

#### 3a. Synthesis of thioacetal **3**

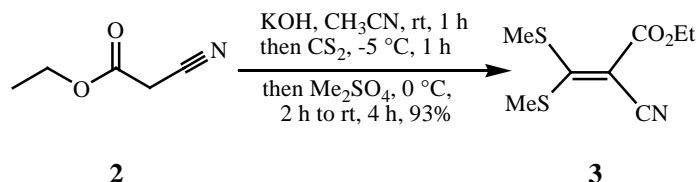

To a mixture of potassium hydroxide (82%, 68.5 g, 1.0 mol) in 250 mL of acetonitrile, ethyl cyanoacetate (**2**, 94%, 60.2 g, 0.5 mol) was added at room temperature. The resulting mixture was stirred at room temperature for 1 h, and carbon disulfide (38.1 g, 0.5 mol) was added at  $-5\text{ }^{\circ}\text{C}$ . The mixture stirred at  $-5\text{ }^{\circ}\text{C}$  for 1 h, and dimethyl sulfate (126.0 g, 1.0 mol) was added at  $0\text{ }^{\circ}\text{C}$ . The resulting mixture was stirred at  $0\text{ }^{\circ}\text{C}$  for 2 h, stirred at room temperature for 4 h, and evaporated under reduced pressure. The residue was washed with 1.0 L of water, filtered, and purified by column chromatography over silica gel (gradient elution 10%  $\rightarrow$  30% ethyl acetate in heptanes) to afford thioacetal **3** (99.8 g) in 93% yield. Pale yellow solids; mp =  $58\text{--}60\text{ }^{\circ}\text{C}$ ;  $^1\text{H}$  NMR (300MHz,  $\text{CDCl}_3$ )  $\delta$  4.11 (q, 2H,  $J = 7.1\text{ Hz}$ ), 2.60 (s, 3H), 2.46 (s, 3H), 1.18 (t, 3H,  $J = 7.1\text{ Hz}$ );  $^{13}\text{C}$  NMR (75 MHz,  $\text{CDCl}_3$ )  $\delta$  180.4, 161.6, 115.5, 98.1, 61.2, 20.4, 18.5, 13.7; FTIR (film): 2981, 2930, 2210, 1700, 1460, 1425, 1248, 1142, 1024, 909,  $769\text{ cm}^{-1}$ . HRMS (TOF MS  $\text{ES}^+$ )  $m/z$ : Calcd for  $\text{C}_8\text{H}_{11}\text{NO}_2\text{S}_2\text{Na}$   $[\text{M}+\text{Na}]^+$ : 240.0129. Found: 240.0133. Anal. calcd for  $\text{C}_8\text{H}_{11}\text{NO}_2\text{S}_2$ : C, 44.22; H, 5.10; N, 6.45. Found: C, 44.17; H, 5.24; N, 6.65.

#### 3b. Synthesis of aminopyrazole **4**

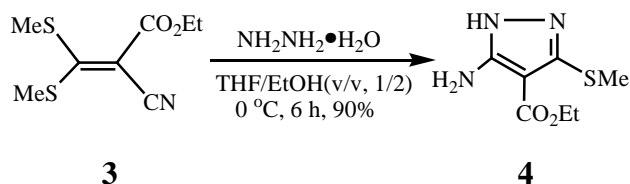

To a solution of thioacetal **3** (21.7 g, 0.1 mol) in acetonitrile (30 mL) and ethanol (60 mL), aqueous hydrazine (85%, 6.1 g, 0.1 mol) was added dropwise at  $0\text{ }^{\circ}\text{C}$ . The resulting mixture was

stirred at 0 °C for 6 h, and evaporated under reduced pressure. The residue was redissolved in 100 mL of ethyl acetate, and then 50 mL of water was added. The two layers were separated, and the aqueous layer was extracted with ethyl acetate (3 x 50 mL). The combined organic extracts were washed with brine, dried over anhydrous sodium sulfate, filtered, and concentrated. The residue was purified by column chromatography over silica gel (gradient elution 50% → 80% ethyl acetate in heptanes) to afford aminopyrazole **4** (18.0 g) in 90% yield. Pale yellow solids; mp = 136–138 °C; <sup>1</sup>H NMR (300MHz, CDCl<sub>3</sub>) δ 10.96 (s, br, 1H), 5.55 (s, br, 2H), 4.23 (q, 2H, *J* = 6.9 Hz), 2.41 (s, 3H), 1.31 (t, 3H, *J* = 6.9 Hz); <sup>13</sup>C NMR (75 MHz, CDCl<sub>3</sub>) δ 164.3, 153.3, 148.6, 94.1, 59.9, 14.3, 13.7; FTIR (film): 3471, 3327, 2979, 1665, 1618, 1526, 1403, 1381, 1309, 1137, 1037, 787 cm<sup>-1</sup>. HRMS (TOF MS ES<sup>+</sup>) *m/z*: Calcd for C<sub>7</sub>H<sub>11</sub>N<sub>3</sub>O<sub>2</sub>SNa [M+Na]<sup>+</sup>: 224.0470. Found: 224.0468. Anal. calcd for C<sub>7</sub>H<sub>11</sub>N<sub>3</sub>O<sub>2</sub>S: C, 41.78; H, 5.51; N, 20.88. Found: C, 56.65; H, 5.63; N, 20.97.

### 3c. Synthesis of pyrazolo[1,5-*a*]pyrimidine **1**

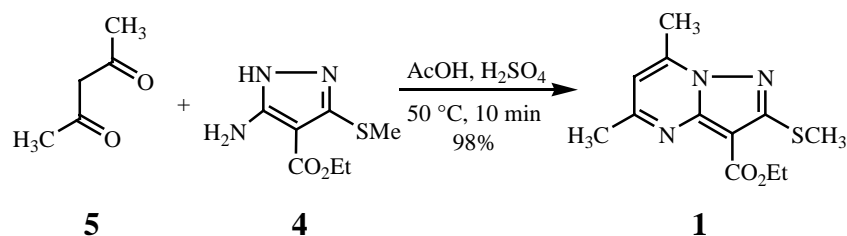

To a solution of aminopyrazole **4** (2.4 g, 10.0 mmol) in 20 mL of acetic acid, pentane-2,4-dione (**5**, 1.2 g, 12.0 mmol) and two drops of concentrated H<sub>2</sub>SO<sub>4</sub> (98%) was added. The resulting mixture was stirred at 50 °C for 10 min, and then 30 mL of water was added. The mixture was extracted with ethyl acetate (3 x 50 mL). The combined organic extracts were washed with brine, dried over anhydrous sodium sulfate, filtered, and concentrated. The residue was purified by column chromatography over silica gel (gradient elution 30% → 50% ethyl acetate in heptanes) to afford pyrazolo[1,5-*a*]pyrimidine **1** (2.8 g) in 90% yield. White solids; mp = 168–170 °C; <sup>1</sup>H NMR (300MHz, CD<sub>3</sub>CN) δ 6.82 (s, 1H), 4.31 (q, 2H, *J* = 6.9 Hz), 2.67 (s, 3H), 2.58 (s, 3H), 2.55 (s, 3H), 1.35 (t, 3H, *J* = 6.9 Hz); <sup>1</sup>H NMR (300MHz, CDCl<sub>3</sub>) δ 6.56 (s, 1H), 4.37 (q, 2H, *J* = 7.1 Hz), 2.63 (s, 3H), 2.56 (s, 3H), 2.54 (s, 3H), 1.38 (t, 3H, *J* = 7.1 Hz); <sup>13</sup>C NMR (75MHz, CDCl<sub>3</sub>) δ 162.9,

161.9, 158.4, 149.1, 145.2, 109.1, 98.6, 60.0, 24.9, 16.7, 14.3, 13.1; FTIR (KBr) 3062, 2988, 1713, 1629, 1553, 1512, 1437, 1380, 1342, 1248, 1154, 1044, 795, 713  $\text{cm}^{-1}$ . HRMS (TOF MS  $\text{ES}^+$ )  $m/z$ : Calcd for  $\text{C}_{12}\text{H}_{15}\text{N}_3\text{O}_2\text{SNa}$   $[\text{M}+\text{Na}]^+$ : 288.0783. Found: 288.0789. Anal. calcd for  $\text{C}_{12}\text{H}_{15}\text{N}_3\text{O}_2\text{S}$ : C, 54.32; H, 5.70; N, 15.84. Found: C, 54.27; H, 5.88; N, 15.72. Fluorescence quantum yield ( $\phi_{\text{fl}}$ ) = 0.518 in  $\text{CH}_3\text{CN}$ ).

The mixture of 5,7-dimethyl-2-(methylthio)pyrazolo[1,5-*a*]pyrimidine-3-carboxylate ethyl ester (**1**, 1 equivalent) and  $\text{In}(\text{OTf})_3$  (1 equivalent) in  $\text{CD}_3\text{CN}$ :  $^1\text{H}$  NMR (300MHz,  $\text{CD}_3\text{CN}$ )  $\delta$  7.28 (s, 1H), 4.51 (q, 2H,  $J = 7.1$  Hz), 2.94 (s, 3H), 2.89 (s, 3H), 2.68 (s, 3H), 1.41 (t, 3H,  $J = 6.9$  Hz).

## 4. $^1\text{H}$ NMR and $^{13}\text{C}$ NMR Spectra

### 4a. Thioacetal **3**

$^1\text{H}$  NMR (300MHz,  $\text{CDCl}_3$ )

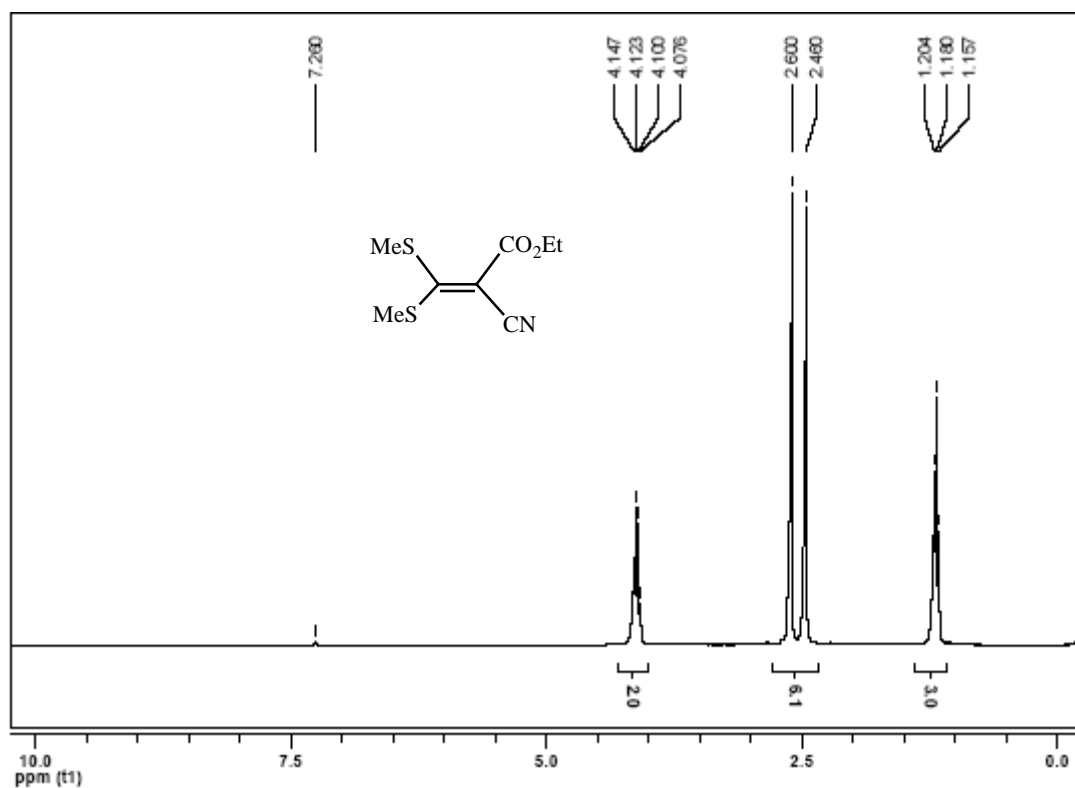

$^{13}\text{C}$  NMR (75MHz,  $\text{CDCl}_3$ )

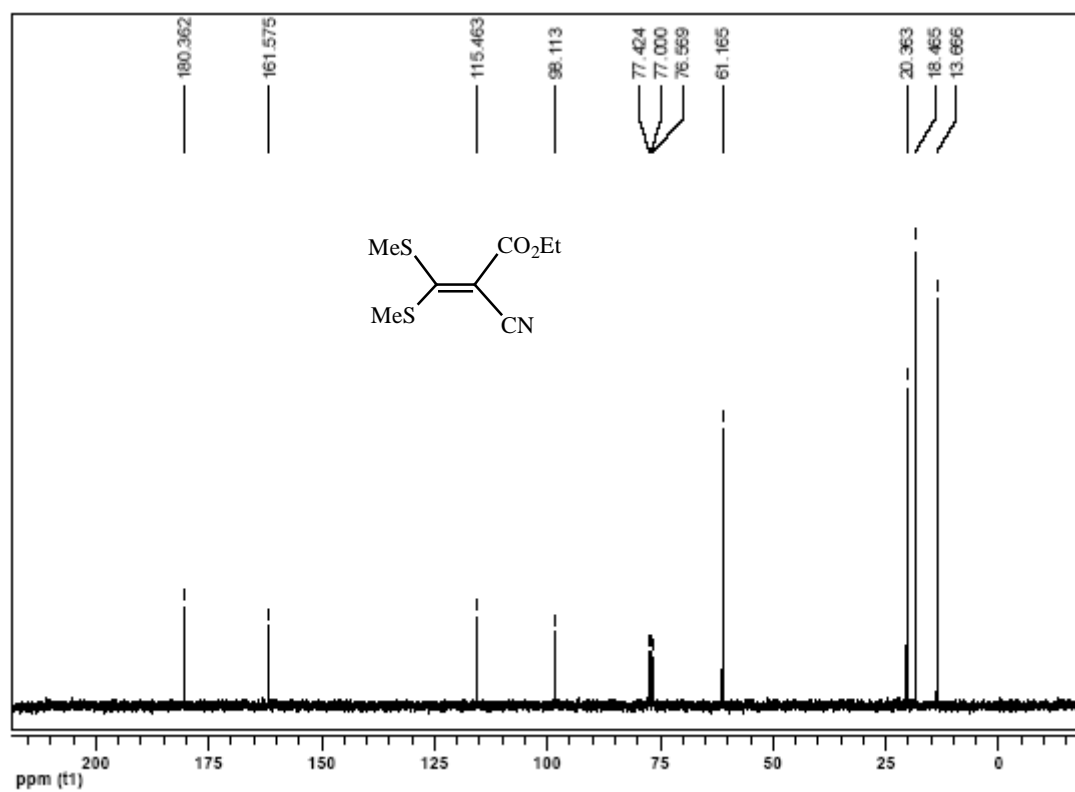

#### 4b. Aminopyrazole **4**

$^1\text{H}$  NMR (300MHz,  $\text{CDCl}_3$ )

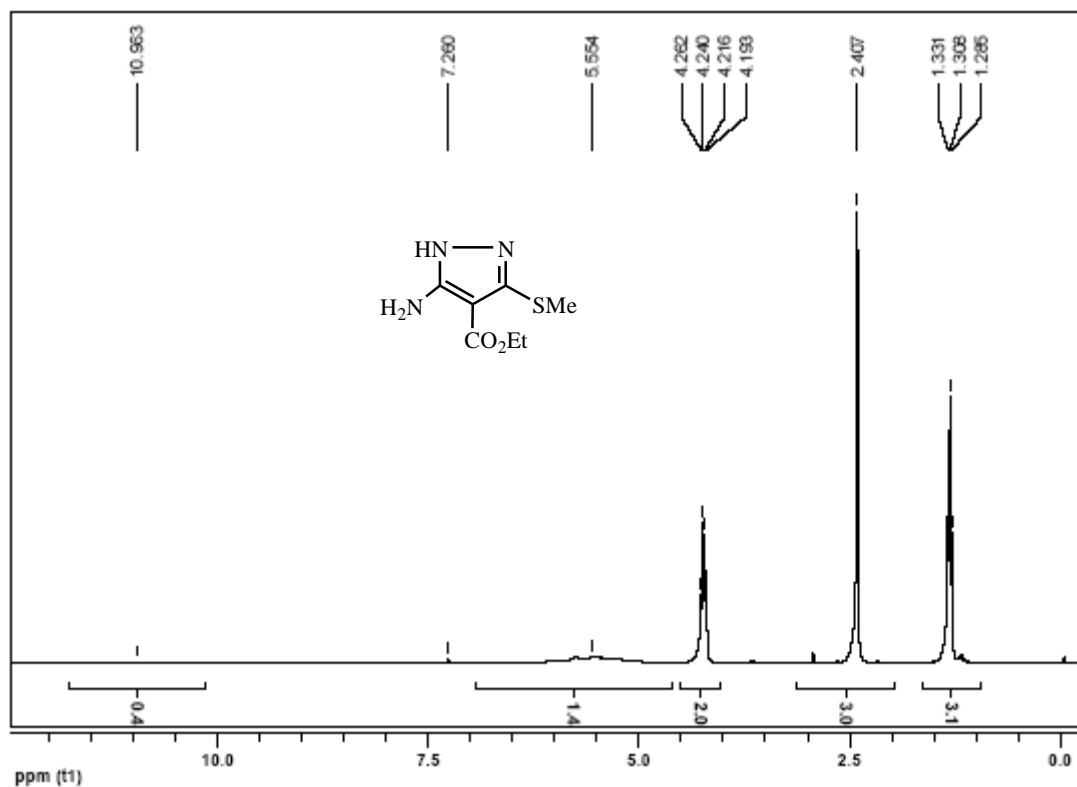

$^{13}\text{C}$  NMR (75MHz,  $\text{CDCl}_3$ )

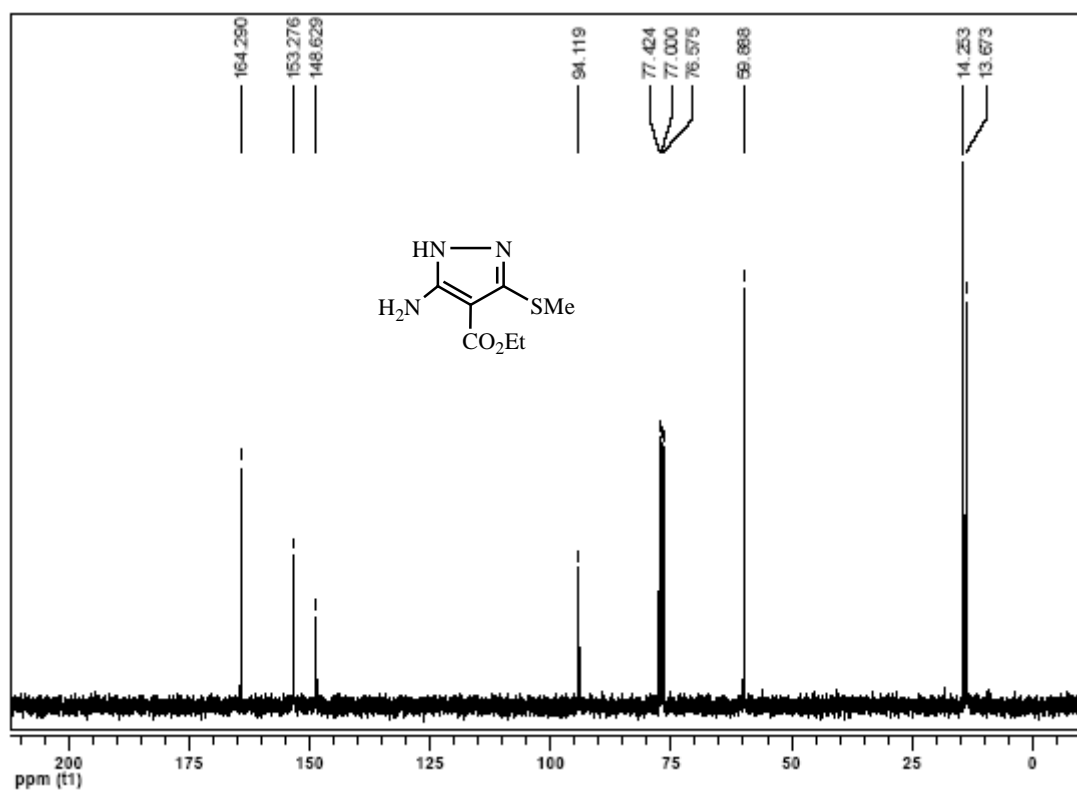

### 4c1. Pyrazolo[1,5-*a*]pyrimidine **1**

$^1\text{H}$  NMR (300MHz,  $\text{CDCl}_3$ )

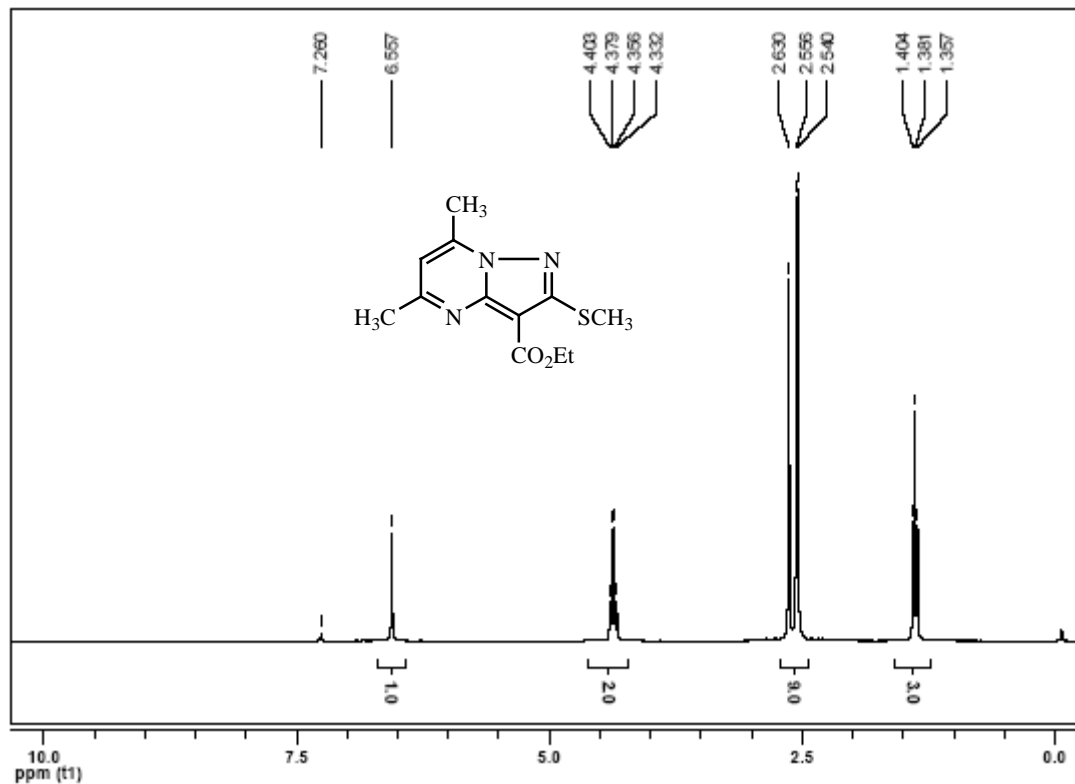

$^{13}\text{C}$  NMR (75MHz,  $\text{CDCl}_3$ )

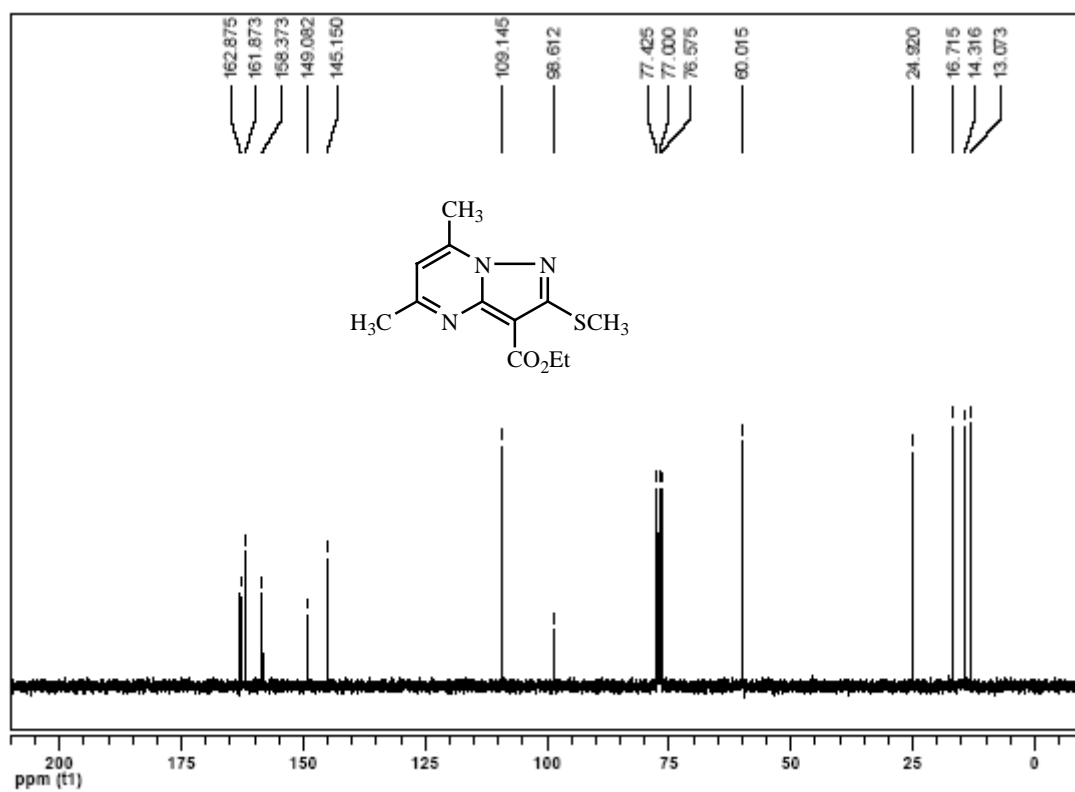



### 4c2. Pyrazolo[1,5-*a*]pyrimidine **1**

$^1\text{H NMR}$  (300MHz,  $\text{CD}_3\text{CN}$ )

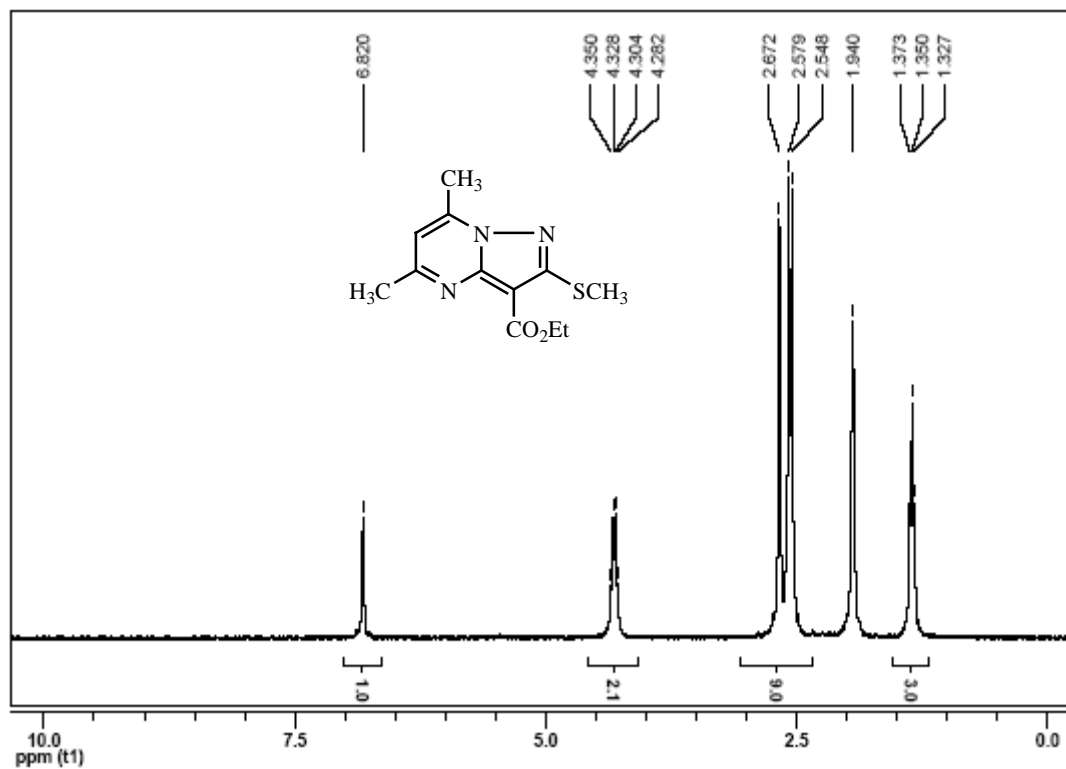

### 4d. **1** in the presence of $\text{In}(\text{OTf})_3$ (1 molar equivalent) in $\text{CD}_3\text{CN}$

$^1\text{H NMR}$  (300MHz,  $\text{CD}_3\text{CN}$ )

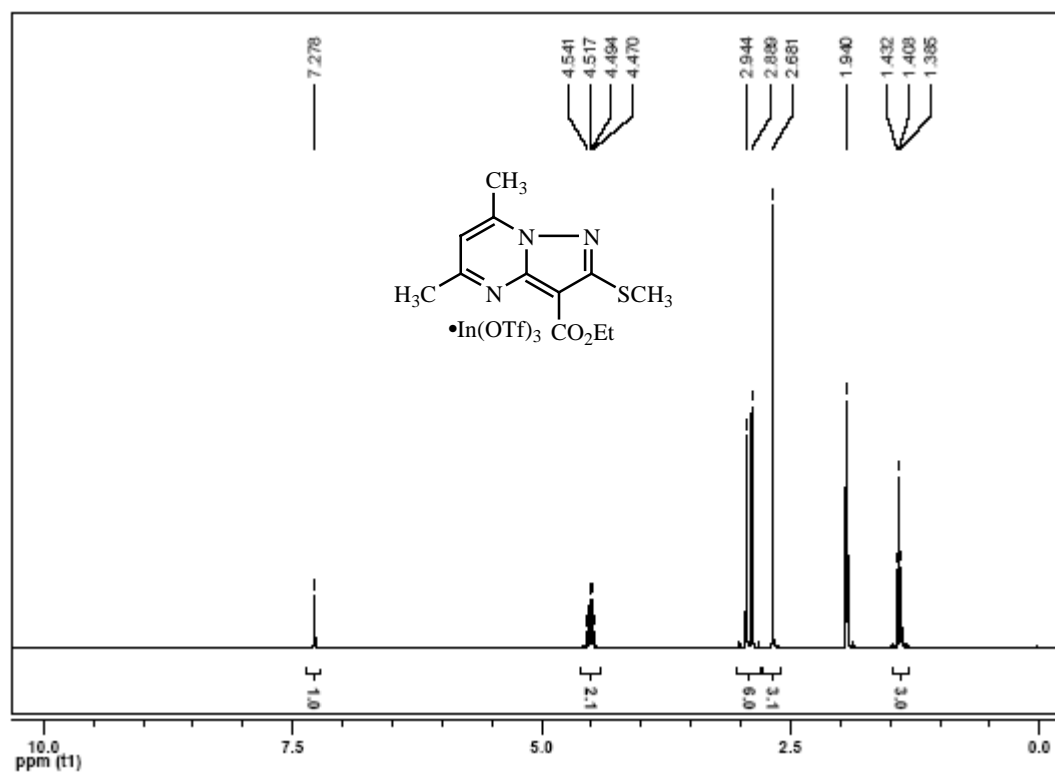

## 5. Fluorescence Spectra

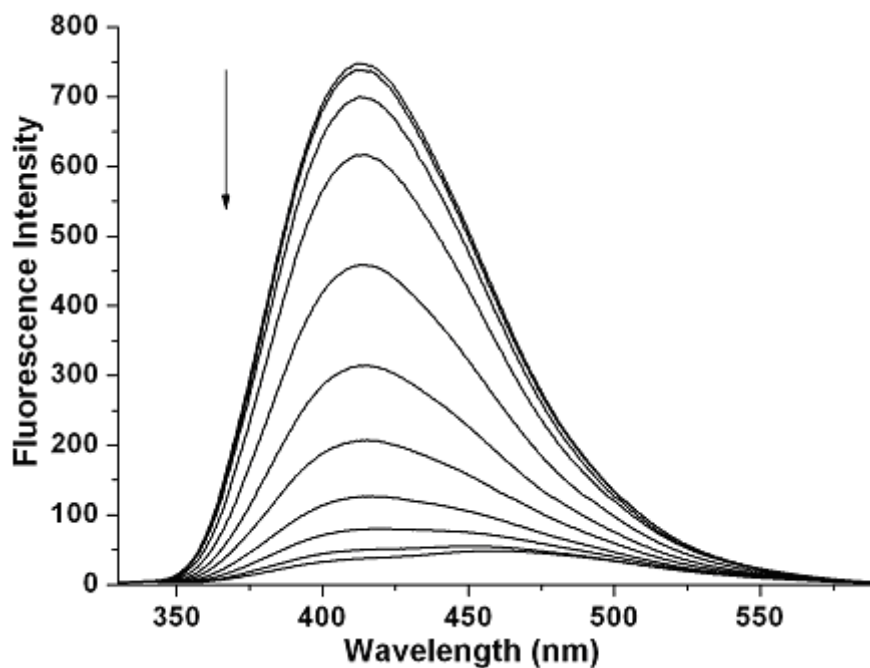

**Figure 1.** Fluorescence emission spectra of pyrazolo[1,5-*a*]pyrimidine **1** ( $1 \times 10^{-5}$  M) in the presence of  $\text{In}(\text{OTf})_3$  in  $\text{CH}_3\text{CN}$ . The concentration of  $\text{In}(\text{OTf})_3$ : 0, 0.1, 0.2, 0.3, 0.4, 0.5, 0.6, 0.7, 0.8, 0.9,  $1.0 \times 10^{-5}$  M;  $\lambda_{\text{ex}} = 309$  nm.

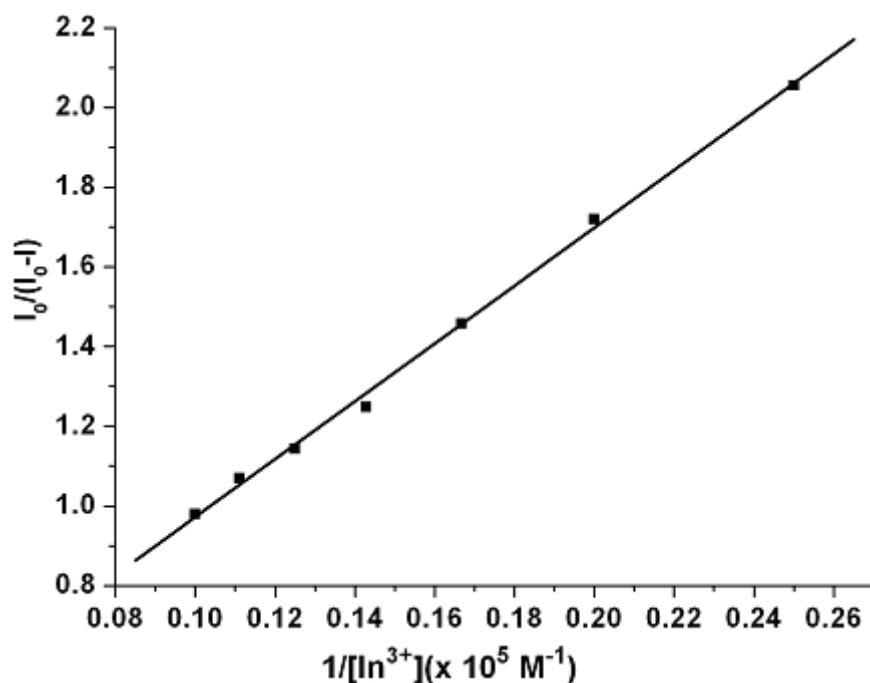

**Figure 2.** Benesi-Hildebrand method for calculating binding constants of **1** with  $\text{In}^{3+}$ . Association constant ( $K$ ) =  $3.37 \times 10^4 \text{ M}^{-1}$ . Linear correlation coefficient ( $R$ ) = 0.9988. The detection limit for  $\text{In}^{3+}$  was found to be  $1.9 \times 10^{-7}$  M.

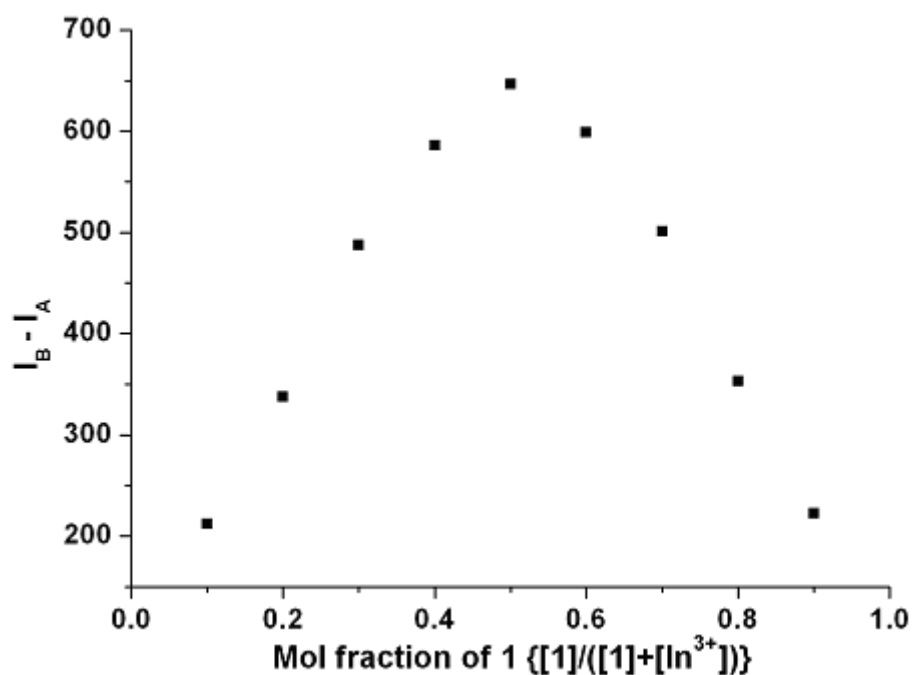

**Figure 3.** Job plot between pyrazolo[1,5-*a*]pyrimidine **1** and In(OTf)<sub>3</sub> in CH<sub>3</sub>CN. [1] + [In<sup>3+</sup>] = 2 × 10<sup>-5</sup> M. λ<sub>ex</sub> = 309 nm.

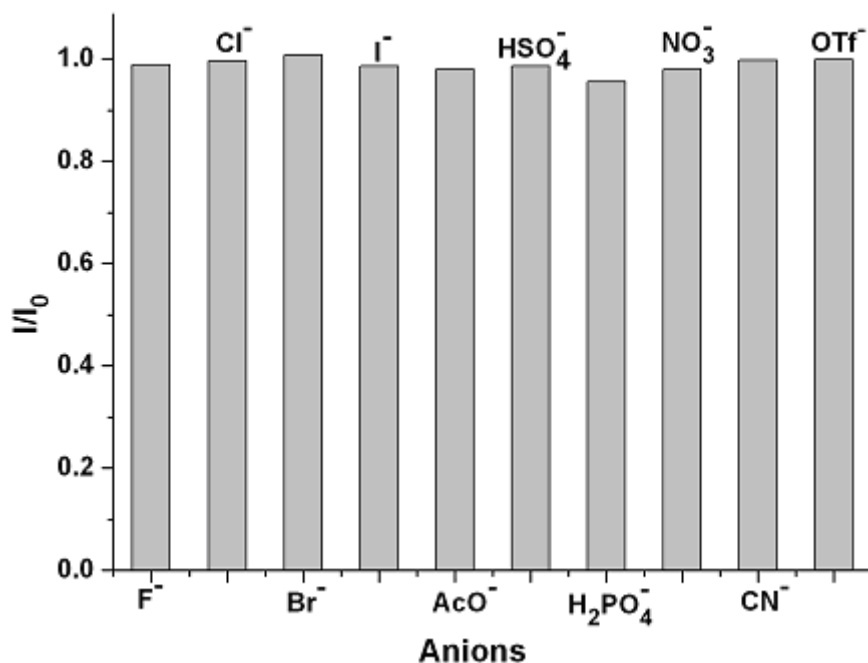

**Figure 4.** Fluorescence responses of pyrazolo[1,5-*a*]pyrimidine **1** in CH<sub>3</sub>CN (1 μM) upon additions of various anions (100 μM of F<sup>-</sup>, Cl<sup>-</sup>, Br<sup>-</sup>, I<sup>-</sup>, AcO<sup>-</sup>, HSO<sub>4</sub><sup>-</sup>, H<sub>2</sub>PO<sub>4</sub><sup>-</sup>, NO<sub>3</sub><sup>-</sup>, CN<sup>-</sup>, OTf<sup>-</sup>). λ<sub>ex</sub> = 309 nm.

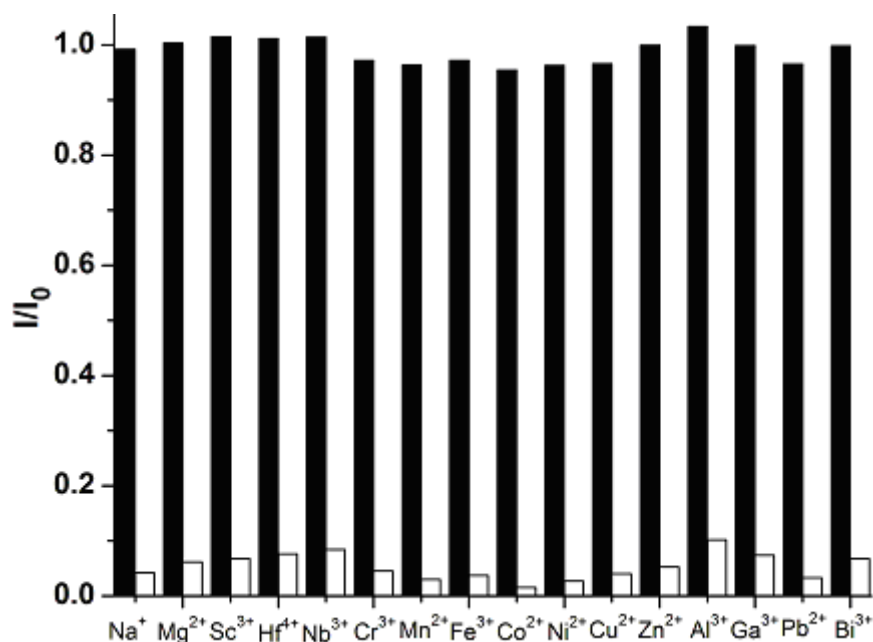

**Figure 5.** Fluorescence responses of **1** to representative ions in CH<sub>3</sub>CN (1 μM). The bars represent the ratio of the final fluorescence response (I) over the initial fluorescence response (I<sub>0</sub>). The black bars represent the response to the addition of the given ions [20 μM of NaCl, Mg(OTf)<sub>2</sub>, Sc(OTf)<sub>3</sub>, Hf(OTf)<sub>4</sub>, NbBr<sub>3</sub>, Cr(NO<sub>3</sub>)<sub>3</sub>, Mn(AcO)<sub>2</sub>, Fe(OTf)<sub>3</sub>, Co(AcO)<sub>2</sub>, NiSO<sub>4</sub>, Cu(OTf)<sub>2</sub>, Zn(OTf)<sub>2</sub>, Al(OTf)<sub>3</sub>, Ga(OTf)<sub>3</sub>, Pb(OAc)<sub>2</sub>, Bi(OTf)<sub>3</sub>]. The white bars represent the response to the addition of 2 μM of In<sup>3+</sup> to the respective solution. λ<sub>ex</sub> = 309 nm.

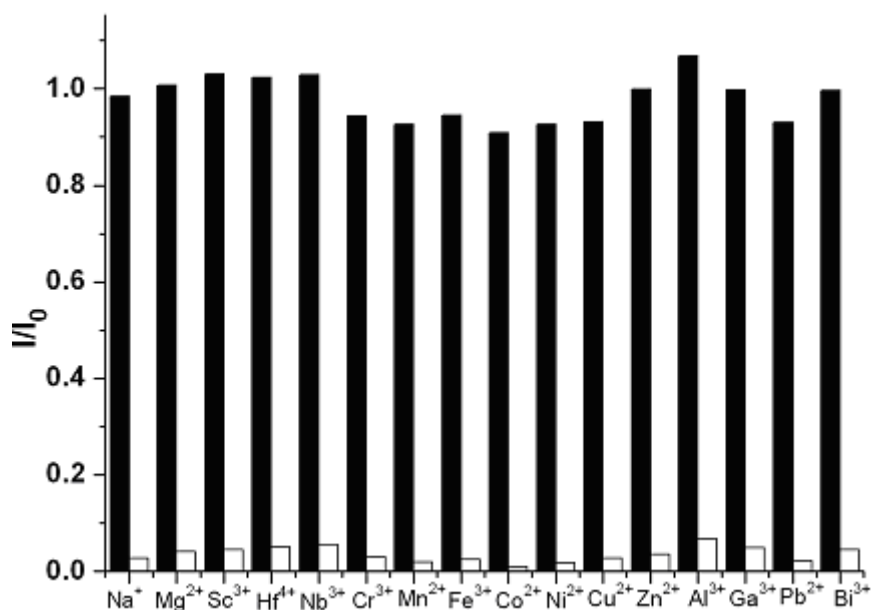

**Figure 6.** Fluorescence responses of **1** to representative ions in CH<sub>3</sub>CN (1 μM). The bars represent the ratio of the final fluorescence response (I) over the initial fluorescence response (I<sub>0</sub>). The black bars represent the response to the addition of the given ions [100 μM of Na<sup>+</sup>(Ia), Mg<sup>2+</sup>(IIa), Sc<sup>3+</sup>(IIIb), Hf<sup>4+</sup>(IVb), Nb<sup>3+</sup>(Vb), Cr<sup>3+</sup>(VIb), Mn<sup>2+</sup>(VIIb), Fe<sup>3+</sup>(VIIIb), Co<sup>2+</sup>(VIIIb), Ni<sup>2+</sup>(VIIIb), Cu<sup>2+</sup>(Ib), Zn<sup>2+</sup>(IIb), Al<sup>3+</sup>(IIIa), Ga<sup>3+</sup>(IIIa), Pb<sup>2+</sup>(IVa), Bi<sup>3+</sup>(Va)]. The white bars represent the response to the addition of 10 μM of In<sup>3+</sup>(IIIa) to the respective solution. λ<sub>ex</sub> = 309 nm.

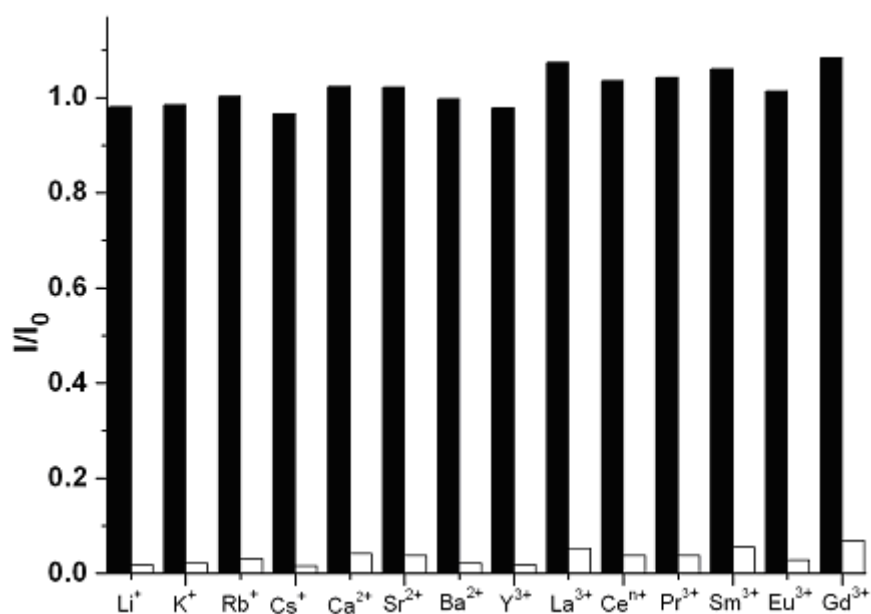

**Figure 7.** Fluorescence responses of **1** to screened ions in CH<sub>3</sub>CN (1 μM). The bars represent the ratio of the final fluorescence response (I) over the initial fluorescence response (I<sub>0</sub>). The black bars represent the response to the addition of the given ions (100 μM of Li<sup>+</sup>, K<sup>+</sup>, Rb<sup>+</sup>, Cs<sup>+</sup>, Ca<sup>2+</sup>, Sr<sup>2+</sup>, Ba<sup>2+</sup>, Y<sup>3+</sup>, La<sup>3+</sup>, Ce<sup>3+</sup>, Pr<sup>3+</sup>, Sm<sup>3+</sup>, Eu<sup>3+</sup>, Gd<sup>3+</sup>). The white bars represent the response to the addition of 10 μM of In<sup>3+</sup> to the respective solution. λ<sub>ex</sub> = 309 nm.

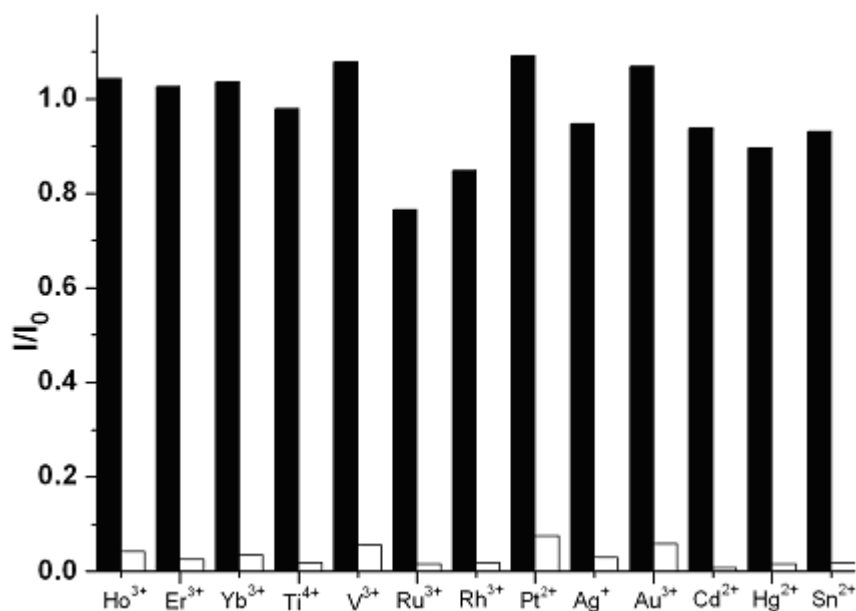

**Figure 8.** Fluorescence responses of **1** to screened ions in CH<sub>3</sub>CN (1 μM). The bars represent the ratio of the final fluorescence response (I) over the initial fluorescence response (I<sub>0</sub>). The black bars represent the response to the addition of the given ions (100 μM of Ho<sup>3+</sup>, Er<sup>3+</sup>, Yb<sup>3+</sup>, Ti<sup>4+</sup>, V<sup>3+</sup>, Ru<sup>3+</sup>, Rh<sup>3+</sup>, Pt<sup>2+</sup>, Ag<sup>+</sup>, Au<sup>3+</sup>, Cd<sup>2+</sup>, Hg<sup>2+</sup>, Sn<sup>2+</sup>). The white bars represent the response to the addition of 10 μM of In<sup>3+</sup> to the respective solution. λ<sub>ex</sub> = 309 nm.

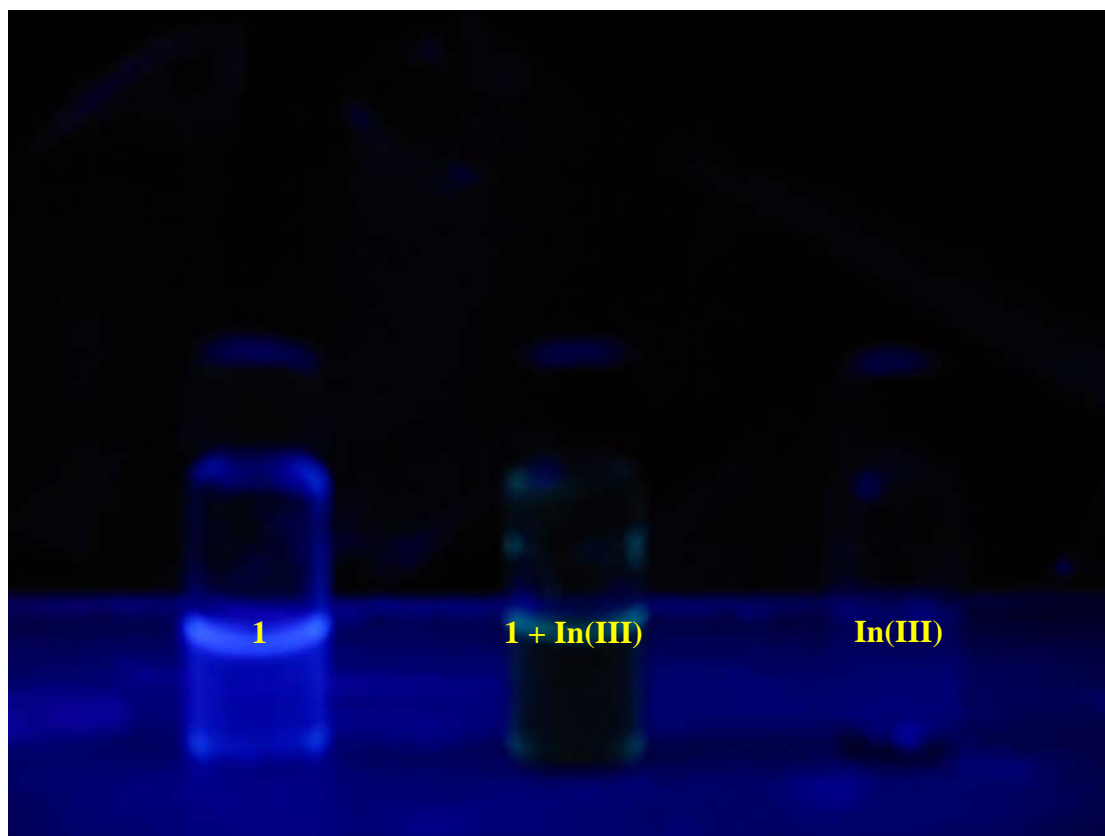

**Figure 9.** A photo of **1**, **1** in the presence of  $\text{In}^{3+}$ , and  $\text{In}^{3+}$  in  $\text{CH}_3\text{CN}$  under ultraviolet light (UV)

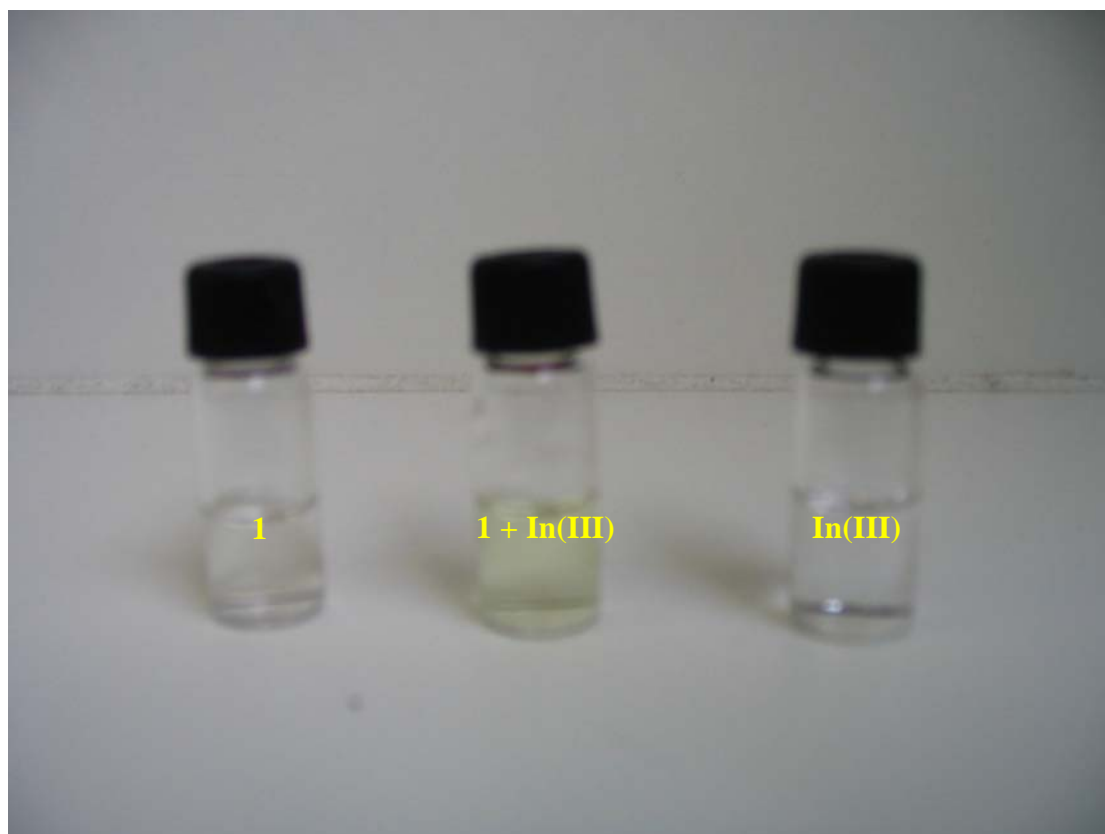

**Figure 10.** A photo of **1**, **1** in the presence of  $\text{In}^{3+}$ , and  $\text{In}^{3+}$  in  $\text{CH}_3\text{CN}$  under sunlight
